# Supplementary material
Source: PubMed Central journal article supplement (PMC4275156)
Supplement: bc500415x_si_001.pdf [file bc500415x_si_001.pdf]

## SUPPORTING INFORMATION

### Matching the decay half-life with the biological half-life: ImmunoPET imaging with $^{44}\text{Sc}$ -labeled Cetuximab Fab fragment

Rubel Chakravarty,<sup>#1,2</sup> Shreya Goel,<sup>#3</sup> Hector F. Valdovinos,<sup>4</sup> Reinier Hernandez,<sup>4</sup> Hao Hong,<sup>1</sup>  
Robert J. Nickles,<sup>4</sup> and Weibo Cai <sup>\*1,4,5</sup>

<sup>1</sup> Department of Radiology, University of Wisconsin - Madison, WI, USA

<sup>2</sup> Isotope Production and Applications Division, Bhabha Atomic Research Centre, Mumbai, India

<sup>3</sup> Materials Science Program, University of Wisconsin-Madison, WI, USA

<sup>4</sup> Department of Medical Physics, University of Wisconsin - Madison, WI, USA

<sup>5</sup> University of Wisconsin Carbone Cancer Center, Madison, WI, USA

*#Both the authors contributed equally*

#### **\*Requests for reprints:**

Weibo Cai, PhD, Departments of Radiology and Medical Physics, University of Wisconsin - Madison, Room 7137, 1111 Highland Avenue, Madison, WI 53705-2275, USA.

Email: [wcai@uwhealth.org](mailto:wcai@uwhealth.org); Phone: 608-262-1749; Fax: 608-265-0614

## Experimental Section

### Optimization of radiolabeling condition

The pH of the reaction medium plays a crucial role in affecting the radiolabeling yield and specific activity of the radiolabeled agent. In order to determine the optimum pH, the radiolabeling of CHX-A''-DTPA with  $^{44}\text{Sc}$  was carried out under different pH conditions. For this purpose,  $^{44}\text{Sc}$  (74 MBq) was diluted in 500  $\mu\text{L}$  of 0.5 M sodium acetate buffer and added to 20  $\mu\text{g}$  of CHX-A''-DTPA. The pH of the reaction mixture was carefully adjusted to the desired values (3.0, 4.5, 6.5, and 8.0) and incubated for 30 min at room temperature (25  $^{\circ}\text{C}$ ) with constant shaking. The radiolabeling yield was determined by thin layer chromatography (TLC), adopting the reported procedure.<sup>1</sup> The chromatogram was developed using 50% aqueous acetonitrile as the eluent and it was observed that  $^{44}\text{Sc}$ -CHX-A''-DTPA migrated towards the solvent front ( $R_f = 0.8\text{-}0.9$ ), while under identical conditions unlabeled  $^{44}\text{Sc}^{3+}$  remained at the point of application ( $R_f = 0$ ). The radiolabeling yield of  $^{44}\text{Sc}$ -CHX-A''-DTPA was found to be maximum (> 80%) when the reaction was carried out at pH ~4.5 (**Figure S2**). Therefore, all subsequent  $^{44}\text{Sc}$ -labeling reactions using CHX-A''-DTPA-Cetuximab-Fab was carried out at this pH to maximize the radiolabeling yield and specific activity of the radiolabeled agent.

### Histology

To further validate that tumor uptake of  $^{44}\text{Sc}$ -CHX-A''-DTPA-Cetuximab-Fab was indeed EGFR specific, U87MG (high EGFR expression) and Caco-2 (low EGFR expression) tumor-bearing mice were each injected with a larger dose of Alexafluor350-Cetuximab-Fab (5 mg/kg of mouse body weight) and euthanized at 4 h p.i. The tissues (tumor, liver, kidney and muscle) were dissected and frozen in the Tissue-TEK embedding medium to prevent the tissues from degradation. The frozen tissue samples were sectioned to obtain slices of 7  $\mu\text{m}$  thickness. The

frozen tissue slices were then fixed with cold acetone for 10 min and dried in the air for 30 min. After rinsing with PBS and blocking with 10 % donkey serum for 30 min at room temperature, the slices were incubated with Cetuximab (0.5  $\mu\text{g}/\text{mL}$ ) for 1 h at 4 °C and visualized using FITC-labeled donkey anti-rat IgG. After washing with PBS, all images were acquired with a Nikon Eclipse Ti microscope.

In tissues from U87MG tumor bearing mice, accumulation of Alexafluor350-Cetuximab-Fab (blue fluorescence) co-localized with the expression of EGFR in tumor tissues (green fluorescence) (*Figure S5*). The excellent overlay of blue and green signals in U87MG tumors suggested that Alexafluor350-Cetuximab-Fab binds specifically to EGFR. Very faint signals were observed in muscles which serve as the control. The absence of blue signal from Caco-2 tumors further confirms the EGFR specificity of Cetuximab-Fab.

## Supplementary Table

**Table S1:** Determination of  $^{44}\text{Sc}$  labeling yields when different BFCs were conjugated with Cetuximab-Fab. All reactions were carried out at room temperature (25 °C) for 30 min.

| <b>BFC used for conjugation with Cetuximab-Fab</b> | <b>Radiolabeling yield (%)</b> | <b>Theoretical stability constant (<math>\log K_{\text{ML}}</math>)<sup>@</sup></b> | <b>Reference</b> |
|----------------------------------------------------|--------------------------------|-------------------------------------------------------------------------------------|------------------|
| DOTA                                               | 21±3                           | 30.8                                                                                | (2)              |
| NOTA                                               | 14±1                           | 16.5                                                                                | (3, 4)           |
| DTPA                                               | 68±2                           | 27.4                                                                                | (2)              |
| CHX-A''-DTPA                                       | 66±5                           | #                                                                                   | #                |

<sup>@</sup> $K_{\text{ML}} = [\text{ML}] / [\text{M}][\text{L}]$ ; #not reported.

Supplementary Figures

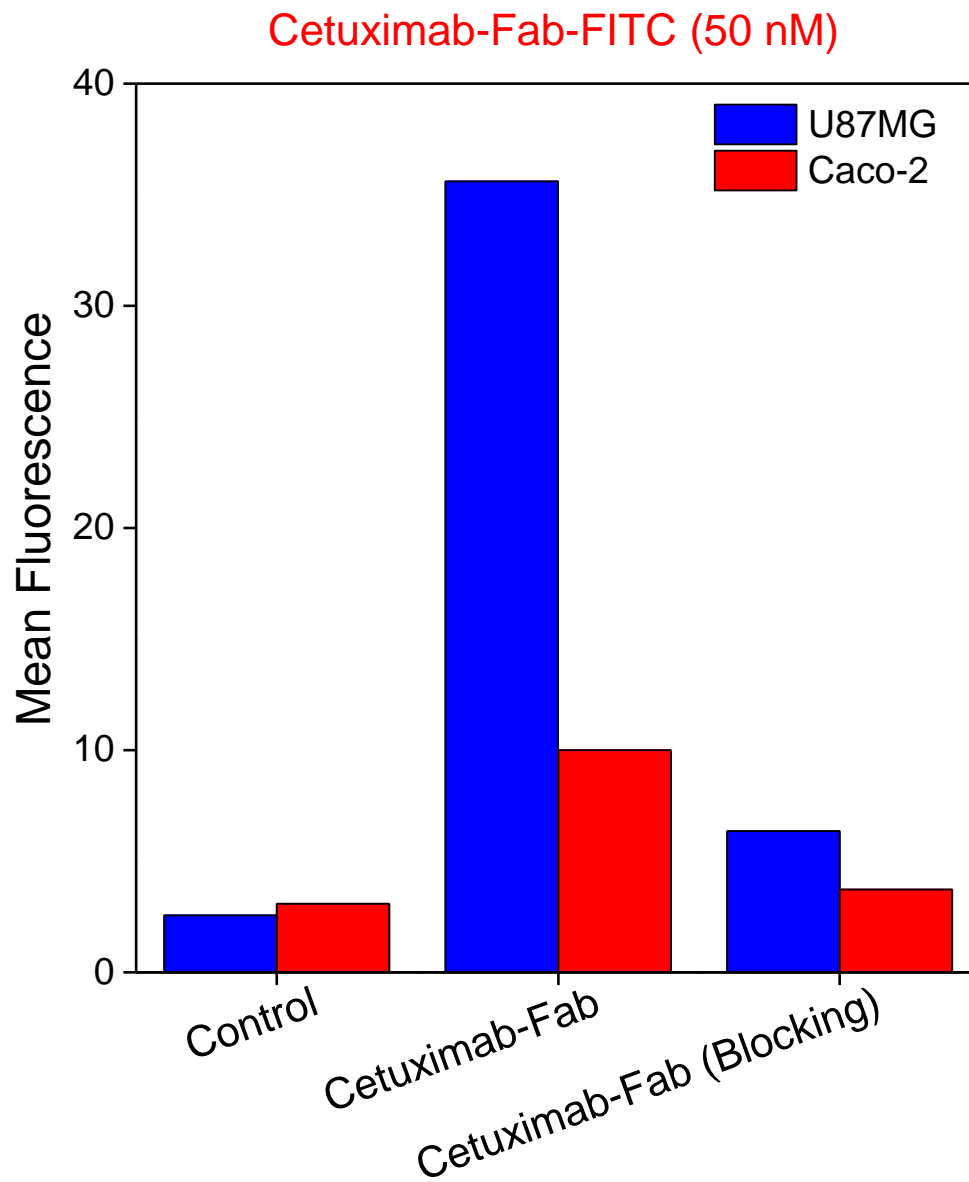

**Figure S1:** Mean fluorescence intensities of U87MG and Caco-2 cells for targeted and blocking groups in flow cytometry studies.

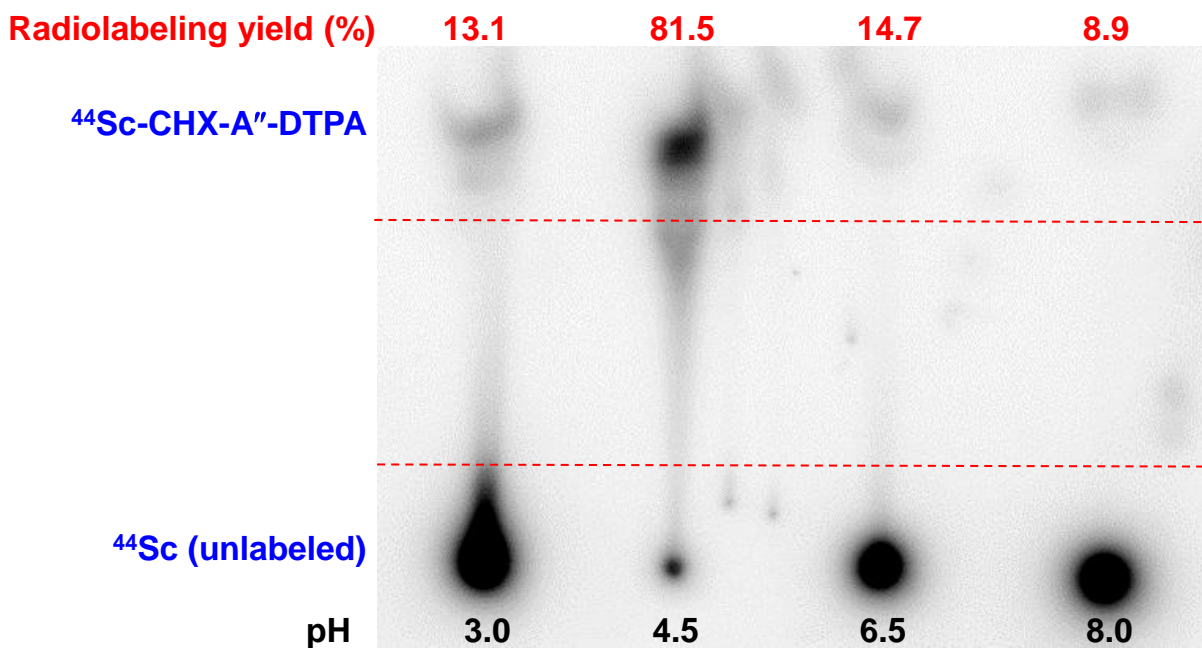

**Figure S2:** Determination of radiolabeling yields of  $^{44}\text{Sc-CHX-A''-DTPA}$  when reaction was carried out under different pH conditions. The unlabeled  $^{44}\text{Sc}$  remains at the point of application while  $^{44}\text{Sc-CHX-A''-DTPA}$  migrates to the solvent front.

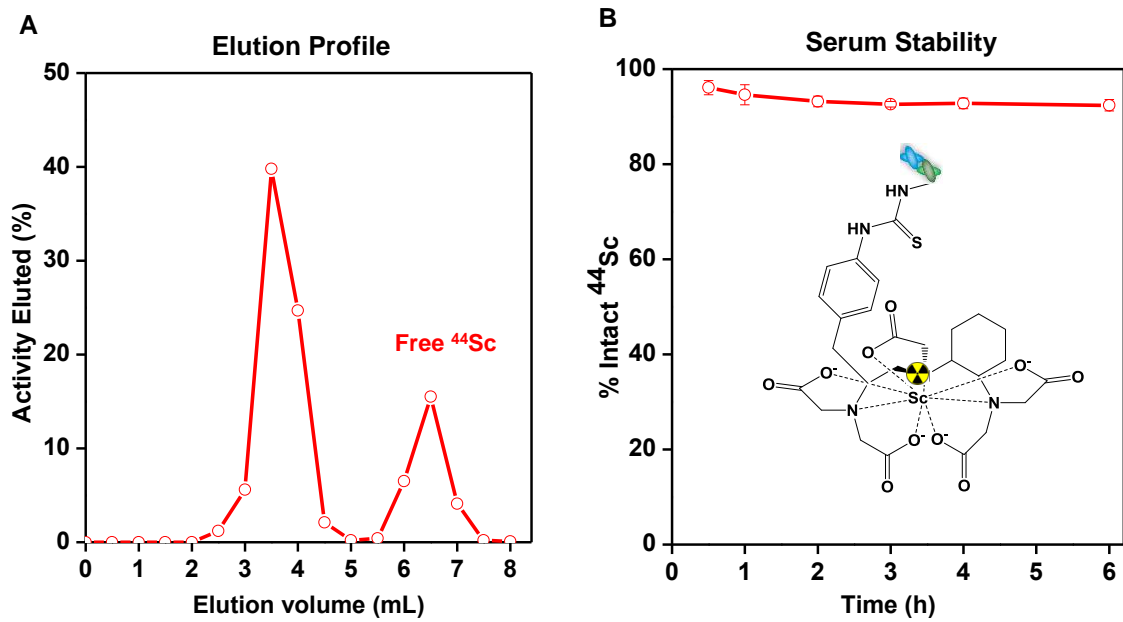

**Figure S3:** (A) Elution profile of  $^{44}\text{Sc}$ -CHX-A''-DTPA-Cetuximab-Fab from PD-10 column. (B) Serum stability of  $^{44}\text{Sc}$ -CHX-A''-DTPA-Cetuximab-Fab.

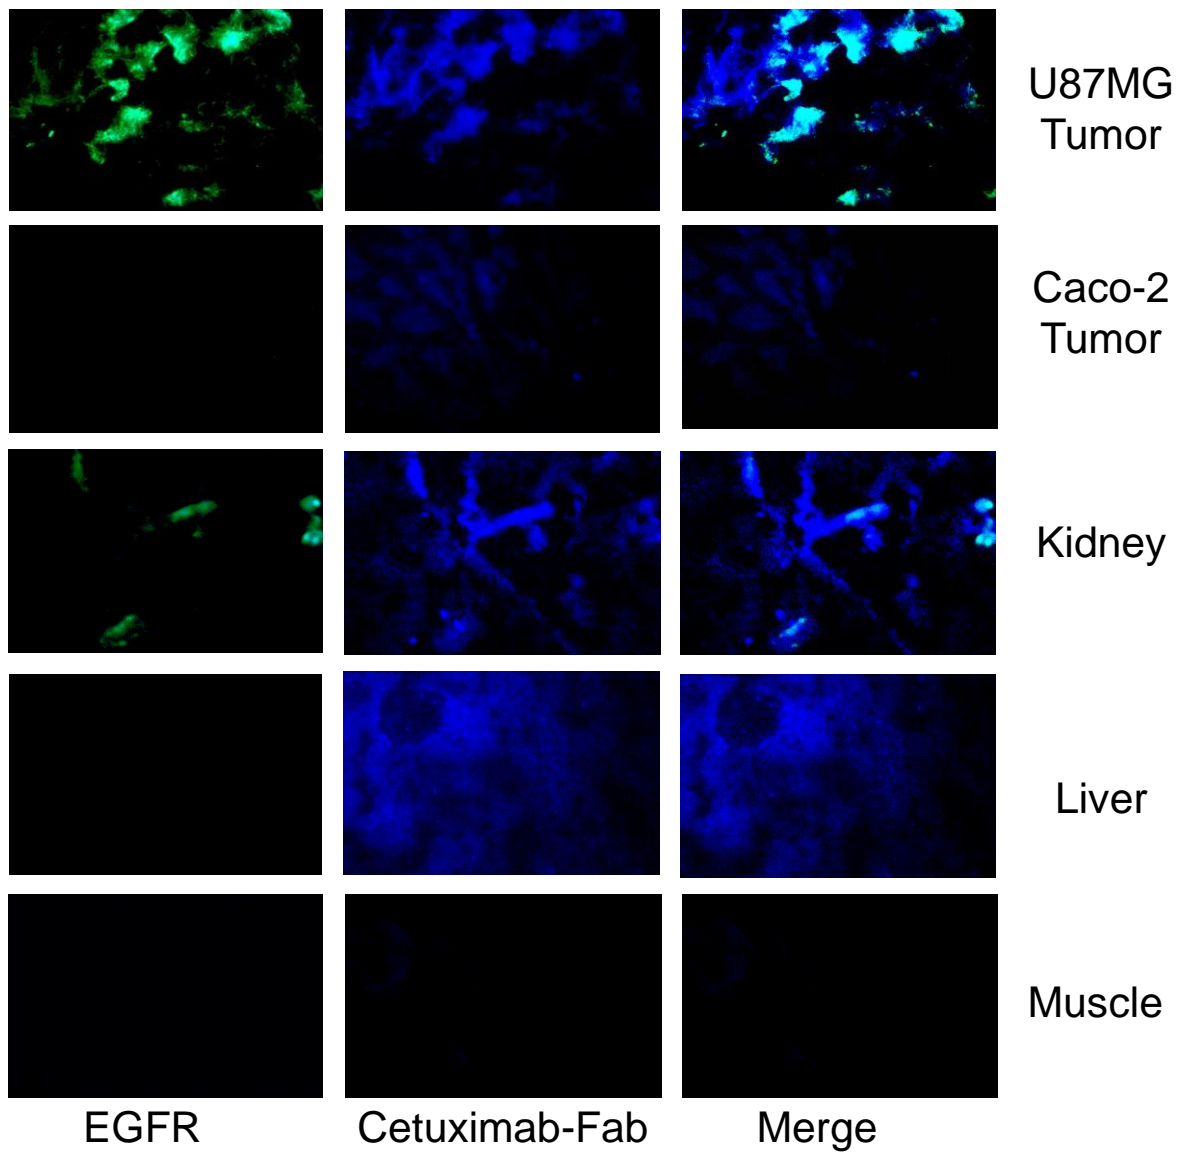

**Figure S4:** Immunofluorescence staining of U87MG tumor, Caco-2 tumor, kidney, liver, and muscle tissue sections.



## References

- (1) Chakravarty, R., Chakraborty, S., and Dash, A. (2014) A systematic comparative evaluation of  $^{90}\text{Y}$ -labeled bifunctional chelators for their use in targeted therapy. *Journal of labelled compounds & radiopharmaceuticals* 57, 65-74.
- (2) Pniok, M., Kubicek, V., Havlickova, J., Kotek, J., Sabatie-Gogova, A., Plutnar, J., Huclier-Markai, S., and Hermann, P. (2014) Thermodynamic and Kinetic Study of Scandium(III) Complexes of DTPA and DOTA: A Step Toward Scandium Radiopharmaceuticals. *Chemistry (Weinheim an der Bergstrasse, Germany)* 20, 7944-55.
- (3) Majkowska-Pilip, A., and Bilewicz, A. (2011) Macrocyclic complexes of scandium radionuclides as precursors for diagnostic and therapeutic radiopharmaceuticals. *Journal of inorganic biochemistry* 105, 313-20.
- (4) Price, E. W., and Orvig, C. (2014) Matching chelators to radiometals for radiopharmaceuticals. *Chemical Society reviews* 43, 260-90.
